# Supplementary material for: Impact of Antioxidant Therapy on Natural Pregnancy Outcomes and Semen Parameters in Infertile Men: A Systematic Review and Meta-Analysis of Randomized Controlled Trials
Source: PubMed Central journal article supplement — World J Mens Health. 2022 Sep 7;41(1):14–48. doi: 10.5534/wjmh.220067 (PMC9826914; doi:10.5534/wjmh.220067), 2022-09-07
Supplement: wjmh-41-14-s002.pdf [file wjmh-41-14-s002.pdf]

**Supplement Table 2.** Eligibility criteria based on the PICOS (Population, Intervention, Comparison/Comparator, Outcomes, Study design) model

|              | Inclusion                                                                                                                                                                                                                                                                                                                             | Exclusion                                                                         |
|--------------|---------------------------------------------------------------------------------------------------------------------------------------------------------------------------------------------------------------------------------------------------------------------------------------------------------------------------------------|-----------------------------------------------------------------------------------|
| Population   | Infertile men                                                                                                                                                                                                                                                                                                                         | Adolescent, patients taking any other fertility drugs, fertile men, animal models |
| Intervention | AOX therapy (single or combined), AOX plus plant extract wherein AOX is the main supplementation<br>Duration: ≤3 months, 6 months or ≥9 months                                                                                                                                                                                        | Use of plant extracts or herbal substances as the main supplementation            |
| Comparison   | Placebo or no treatment                                                                                                                                                                                                                                                                                                               |                                                                                   |
| Outcome      | Primary outcome <ul style="list-style-type: none"> <li>i) Natural pregnancy (per couple)</li> <li>ii) Live birth (per couple)</li> <li>iii) Miscarriage rate (per pregnancy)</li> </ul> Secondary outcome <ul style="list-style-type: none"> <li>i) Sperm parameters</li> <li>ii) Sperm DNA fragmentation</li> </ul> Oxidative Stress |                                                                                   |

AOX: antioxidant.
